## Fluid and osmolyte recovery in the common pond snail *Lymnaea stagnalis* following full-body withdrawal

Sue C. Ebanks\* and Martin Grosell

University of Miami, Rosenstiel School of Marine and Atmospheric Science, Division of Marine Biology and Fisheries, 4600 Rickenbacker Causeway, Miami, FL 33149, USA

\*Author for correspondence (e-mail: sebanks@rsmas.miami.edu)

Accepted 12 November 2007

### SUMMARY

The common pond snail *Lymnaea stagnalis* sacrifices 40–60% of its extracellular fluid (ECF) including solutes to the surrounding environment to fully retract into its shell. Our objectives were to determine recovery time following such ECF loss and characterize mechanisms involved in recovering Na<sup>+</sup>, the primary cationic osmolyte in this snail. Pallial fluid was initially collected post-stimulation and again after a second stimulation on sub-groups of those snails 2 h to 10 weeks after initial sampling. Samples were analyzed for pH, osmotic pressure, and individual solute concentrations. Lost volume was recovered within 8 h with no significant changes in pH or total CO<sub>2</sub>. Significant decreases in osmotic pressure, [Na<sup>+</sup>] (43% loss), and [Cl<sup>-</sup>] recovered in 48 h as a result of enhanced uptake from the water. Copper and total extracellular proteins took 5 weeks to recover. Measurements of Na<sup>+</sup> transport kinetics completed before and immediately after fluid loss revealed a near threefold increase in both affinity and capacity of the Na<sup>+</sup> uptake system. Sodium uptake was independent of ambient Cl<sup>-</sup> and HCO<sub>3</sub><sup>-</sup> in both control and fluid-depleted snails. Amiloride significantly reduced recovery-phase Na<sup>+</sup> uptake rates but did not influence baseline Na<sup>+</sup> flux. Recovery uptake was significantly reduced by amiloride, ethylisopropylamiloride, bafilomycin and ethoxzolamide indicating dependency upon Na<sup>+</sup>/H<sup>+</sup> exchange, H<sup>+</sup> pump activity and H<sup>+</sup> from carbonic anhydrase-catalyzed CO<sub>2</sub> hydration. Thus enhanced uptake during recovery is likely *via* electrogenic Na<sup>+</sup>/H<sup>+</sup> exchange and/or possibly a cation channel.

Key words: sodium uptake kinetics, pallial fluid chemistry, hemolymph, ion transport, active transport, osmoregulation.

### INTRODUCTION

Predator avoidance in aquatic snails is facilitated by surfacing and emergence from the water in snails that have relatively fragile shells, and by hiding or possibly burial in the case of snails with shells of greater crush resistance (Alexander and Covich, 1991; McCarthy and Fisher, 2000; Rundle and Brönmark, 2001). The response is also highly dependent on the type of predator – i.e. shell-invading leeches and flatworms (Townsend and McCarthy, 1980; Brönmark and Malmqvist, 1986) *versus* shell-crushing sunfish or crayfish (Alexander and Covich, 1991; Brown, 1991). Additionally, and central to the present study, snails can perform graded withdrawal of soft tissue into their shells corresponding to the intensity of the predatory attack (Arshavsky et al., 1994). Pulmonate snails, such as the common pond snail *Lymnaea stagnalis* (L.), exhibit emergence behavior to escape predation but when the predatory threat is imminent, *L. stagnalis* can also complete full-body withdrawal by ejecting up to 60% of its total hemolymph volume (Schlichter, 1981), which averages 0.45 ml g<sup>-1</sup> snail body mass (van Aardt, 1968). The extracellular fluid (ECF) enters the pulmonate cavity *via* the haemal pore and is then ejected into the environment through the pneumostome. Because this response can be achieved experimentally by stimulating the foot of the snail, and because the released fluids can be easily collected, the response provides a means by which internal conditions of the snail can be determined without sacrifice or puncture of the integument. Although the withdrawal response offers protection against predation, it is also potentially associated with reduced fitness. One possible cost of this escape response is that the snail

becomes temporarily immobilized on the bottom during the initial recovery phase (personal observation) and is probably more vulnerable to benthic predators such as crayfish during that time. A, presumably, sub-lethal effect is the energetic expense associated with the needed recovery of fluids and osmolytes lost with the release of ECF.

Freshwater snails exhibiting the whole-body retraction and associated fluid loss have a physiological challenge associated with this escape response that may be of greater significance than for marine snails. Marine snails conform to ambient ion concentrations, thus the challenge of recovering ions lost due to retraction is minimal and mostly occurs in parallel with fluid recovery (Krogh, 1946). However, freshwater species are osmoregulators maintaining hyperosmotic conditions relative to the ambient waters. Thus, although both freshwater and seawater species lose fluids on complete full-body withdrawal, solute recovery of this magnitude (presumably as high as 60%), which requires active transport by freshwater species such as *L. stagnalis*, is probably of significant energetic cost for evading predation.

In an attempt to evaluate the severity of the consequence of ECF release, the primary goals of this investigation were to determine (1) the magnitude of electrolyte loss associated with the full-body withdrawal, (2) whether *L. stagnalis* recovers solutes to initial levels following ECF release and (3) the time required to such full recovery. These goals were pursued by completion of a time course study of hemolymph sampling (bleeding) to determine the time to recovery following the initial bleed in naïve, cultured snails.

Findings of relatively rapid recovery of ECF volume and osmotic pressure prompted investigations into the nature of this remarkable homeostatic response. Because  $\text{Na}^+$  is the major cationic osmotic component of the ECF in these organisms (Schlichter, 1981), understanding the mechanism(s) of its recovery following ECF release is essential. It has long been recognized that *L. stagnalis*, like other freshwater organisms (Krogh, 1939; Krogh, 1946), obtains  $\text{Na}^+$  from the surrounding freshwater by active carrier-mediated uptake (Greenaway, 1970), but the mechanism remains to be characterized. Consequently, our next objective was to (4) determine the  $\text{Na}^+$  transport kinetics under basal (un-bled) and early recovery (bled) conditions to evaluate whether the accelerated uptake under fluid recovery conditions was due to altered transport kinetics of the  $\text{Na}^+$  uptake pathways utilized to maintain homeostasis under basal conditions.

In all freshwater organisms examined to date, the process of  $\text{Na}^+$  uptake is mediated at least in part by an electro-chemical gradient generated by the basolateral electrogenic  $\text{Na}^+, \text{K}^+$ -ATPase (Marshall and Grosell, 2006), which is responsible for low intracellular  $\text{Na}^+$  concentrations and polarization of the cell membrane. Apical entry of  $\text{Na}^+$  appears to be linked to  $\text{H}^+$  extrusion either *via* direct  $\text{Na}^+/\text{H}^+$  exchange as first proposed by Krogh (Krogh, 1939) or to  $\text{H}^+$  extrusion *via* the vacuolar  $\text{H}^+$ -ATPase (Lin and Randall, 1991; Bury and Wood, 1999; Fenwick et al., 1999; Grosell and Wood, 2002). In the latter case, electrogenic  $\text{H}^+$  extrusion further polarizes the apical membrane to facilitate  $\text{Na}^+$  entry *via* a putative  $\text{Na}^+$  channel, which so far has not been identified.

Our findings revealed greatly amplified  $\text{Na}^+$  uptake in *L. stagnalis*, which can lose 30% or more of hemolymph  $\text{Na}^+$  content in the response associated with whole-body withdrawal (Schlichter, 1981). One possible characteristic of pathways involved in  $\text{Na}^+$  recovery could be dependency on availability of extracellular anions (de With, 1980; de With et al., 1987). Uptake of  $\text{Na}^+$  in many freshwater organisms requires  $\text{Cl}^-$  (Kirschner, 2004) and the possibility of  $\text{HCO}_3^-$ -dependent  $\text{Na}^+$  uptake *via* a  $\text{Na}^+/\text{HCO}_3^-$ -dependent carrier system exists (Perry et al., 2003). The observed stimulated  $\text{Na}^+$  uptake associated with recovery from ECF release was attributed to both increased transport capacity and affinity. Because apical  $\text{Na}^+$  channels or  $\text{Na}^+/\text{H}^+$  exchange proteins likely would be the primary means by which  $\text{Na}^+$  enters the cell, sensitivity of  $\text{Na}^+$  uptake to amiloride was evaluated to provide insight into the mechanism(s) of enhanced  $\text{Na}^+$  uptake following ECF loss. Furthermore, microtubule-dependent relocation of transport proteins from the cytoplasm to the epithelial membrane (Tresguerres et al., 2006) could also contribute to the rapid activation of the  $\text{Na}^+$  uptake mechanism. Additionally, the enhanced transport may rely on availability of intracellular  $\text{H}^+$  ions (Kirschner, 2004), which are produced by the hydration of  $\text{CO}_2$ , and would therefore be dependent upon carbonic anhydrase (CA). Therefore, our two final objectives were to (5) determine whether the amplified  $\text{Na}^+$  uptake was  $\text{Cl}^-$ - or  $\text{HCO}_3^-$ -dependent and (6) conduct a pharmacological assessment of transport mechanisms involved in  $\text{Na}^+$  recovery.

## MATERIALS AND METHODS

### Experimental snails

Common pond snails *Lymnaea stagnalis* were cultured from a stock originally procured from Dr Naweed Syed, University of Calgary, Canada. Cultures were reared in flow-through tanks supplied with dechlorinated, aerated Miami-Dade County, USA tapwater (Table 1) and were offered a continuous diet of Romaine lettuce,

Table 1. Water chemistry for dechlorinated Miami-Dade county tapwater used for snail cultures

| Characteristic         | Value |
|------------------------|-------|
| [ $\text{Na}^+$ ]      | 1.1   |
| [ $\text{K}^+$ ]       | 0.04  |
| [ $\text{Ca}^{2+}$ ]   | 0.31  |
| [ $\text{Mg}^{2+}$ ]   | 0.12  |
| [ $\text{Cl}^-$ ]      | 1.03  |
| [ $\text{SO}_4^{2-}$ ] | 0.11  |
| [ $\text{HCO}_3^-$ ]   | 0.68  |
| [ $\text{CO}_3^-$ ]    | 0.01  |
| [DOC]                  | 199.1 |
| [Total $\text{CO}_2$ ] | 0.71  |
| pH                     | 7.69  |

All concentrations are in  $\text{mmol l}^{-1}$  except dissolved organic carbon (DOC), which is reported in  $\mu\text{mol l}^{-1}$  of carbon. Bicarbonate concentration and [ $\text{CO}_3^-$ ] were calculated from measured pH and the mean total [ $\text{CO}_2$ ]. Values are taken from M. Grosell, R. Gerdes and K. V. Brix, manuscript in press.

carrot and sweet potato. Snails reproduced readily under these conditions.

### Hemolymph sampling and time course for solute recovery

To determine the time necessary for the snails to recover solutes following loss of extracellular fluid (ECF), the foot of the snail was stimulated using a pipette tip to cause full retraction of the soft tissue into the shell and consequently ECF release. This procedure was performed with snails removed from the water to allow for ECF collection (which will subsequently be referred to as bleeding), after which the snails were immediately returned to the water. The released fluid obtained from the bleeding procedure was retained for later analysis. A total of 134 snails were weighed, bled and reweighed. A second stimulation was performed on subsets of the same 134 snails at 2 h ( $N=8$ ), 4 h ( $N=8$ ), 6 h ( $N=8$ ), 8 h ( $N=8$ ), 10 h ( $N=8$ ), 12 h ( $N=8$ ), 16 h ( $N=8$ ), 18 h ( $N=8$ ), 24 h ( $N=8$ ), 48 h ( $N=8$ ), 72 h ( $N=8$ ), 1 week (168 h,  $N=10$ ), 2 weeks (336 h,  $N=10$ ), 5 weeks ( $N=10$ ) and 10 weeks ( $N=9$ ) following the initial bleeding.

### $\text{Na}^+$ transport kinetics: radioisotope flux experiments

To determine whether rapid recovery of  $\text{Na}^+$  post-bleeding was associated with stimulated  $\text{Na}^+$  uptake capacity and/or enhanced affinity of the  $\text{Na}^+$  transport system,  $\text{Na}^+$  transport kinetics were determined pre- and post-bleeding in individual snails. Sodium-free artificial tapwater (ATW) with ion concentrations (except for  $\text{Na}^+$  and  $\text{Cl}^-$ ) similar to water from Miami-Dade county (Table 1) was used for these experiments and contained nominal concentrations of  $100 \mu\text{mol l}^{-1}$   $\text{MgSO}_4$ ,  $400 \mu\text{mol l}^{-1}$   $\text{CaSO}_4$  and  $100 \mu\text{mol l}^{-1}$   $\text{KHCO}_3$ . For uptake kinetic measurements,  $\text{NaCl}$  was added to achieve a range of nominal [ $\text{Na}^+$ ]: 100, 250, 500, 1000 and  $2000 \mu\text{mol l}^{-1}$ . Individual snails with wet masses between 0.5 and 1 g were randomly selected, weighed and placed in individual chambers containing 15 ml of the appropriate medium ( $N=10$  snails each in individual chambers for each concentration). Equal amounts of radio-labeled  $^{22}\text{Na}$  (2  $\mu\text{Ci}$ ) were then added to each chamber and within 10 min the chamber medium was mixed using a micropipetter, and 5 ml of the water (initial) was removed for later analysis of  $^{22}\text{Na}$  activity and [ $\text{Na}^+$ ]. Snails were then allowed to flux for 1–3 h and all calculations were normalized for flux time. Each snail was then removed from its flux chamber, given a quick rinse in artificial  $^{22}\text{Na}$ -free tapwater having the same  $\text{Na}^+$

concentration as the flux medium, bled, rinsed again, and allowed to recover in individual chambers with dechlorinated tapwater ( $\sim 1 \text{ mmol l}^{-1} \text{ Na}^+$ ) for approximately 1 h. The flux process was then repeated with each snail being allowed to take up  $^{22}\text{Na}$  from the same  $[\text{Na}^+]$  as was used in the initial flux in the un-bled condition but in fresh chambers and solutions including  $^{22}\text{Na}$  isotope. For example a snail initially fluxed in  $500 \mu\text{mol l}^{-1} \text{ Na}^+$  in the un-bled condition was subsequently allowed to flux under the bled condition with fresh medium containing  $500 \mu\text{mol l}^{-1} \text{ Na}^+$ .

#### Assessment of anion dependency in amplified $\text{Na}^+$ uptake post-bleeding

To determine whether  $\text{Na}^+$  uptake under solute recovery conditions was dependent on anion availability in the ambient water, two flux experiments were completed to test  $\text{Cl}^-$  and  $\text{HCO}_3^-$  dependency. In the  $\text{Cl}^-$ -dependency experiment,  $[\text{Cl}^-]$  was varied while maintaining nominal concentrations of  $\text{Mg}^{2+}$ ,  $\text{Ca}^{2+}$ ,  $\text{K}^+$  and  $\text{HCO}_3^-$  as described above and maintaining  $500 \mu\text{mol l}^{-1} [\text{Na}^+]$ . Control medium contained  $500 \mu\text{mol l}^{-1} \text{ Na}^+$  as  $\text{NaCl}$  ( $500 \mu\text{mol l}^{-1}$  nominal  $[\text{Cl}^-]$ ,  $N=10$ ) and two treatment media contained  $500 \mu\text{mol l}^{-1} \text{ Na}^+$  as sodium gluconate ( $0 \mu\text{mol l}^{-1}$  nominal  $[\text{Cl}^-]$ ,  $N=10$ ) or as  $\text{Na}_2\text{SO}_4$  ( $0 \mu\text{mol l}^{-1}$  nominal  $[\text{Cl}^-]$ ,  $N=10$ ). To test  $\text{HCO}_3^-$  dependency of enhanced uptake post-bleed, control medium contained  $500 \mu\text{mol l}^{-1} \text{ Na}^+$  as sodium bicarbonate ( $500 \mu\text{mol l}^{-1}$  nominal  $[\text{HCO}_3^-]$ ,  $N=10$ ) and three treatment media contained  $500 \mu\text{mol l}^{-1} \text{ Na}^+$  as  $\text{NaCl}$  ( $100 \mu\text{mol l}^{-1}$  nominal  $[\text{HCO}_3^-]$ ,  $N=10$ ), sodium gluconate ( $0 \mu\text{mol l}^{-1}$  nominal  $[\text{HCO}_3^-]$ ,  $N=10$ ), and  $\text{Na}_2\text{SO}_4$  ( $0 \mu\text{mol l}^{-1}$  nominal  $[\text{HCO}_3^-]$ ,  $N=10$ ). Concentrations of ambient  $\text{Mg}^{2+}$ ,  $\text{Ca}^{2+}$  and  $\text{K}^+$  were maintained at nominal concentrations as listed in the initial kinetics experiment. The same flux procedures described above were completed on pre-weighed snails 1–1.5 g wet mass and each chamber contained 20 ml of medium for all controls and treatments. Snails were then bled, given a 1-h recovery in appropriate  $500 \mu\text{mol l}^{-1} \text{ Na}^+$  medium, and were allowed to flux again for 2 h after  $^{22}\text{Na}$  was added. Initial and final water samples for both sets of fluxes were analyzed for  $^{22}\text{Na}$  activity and  $[\text{Na}^+]$  as described below. Additionally, 'Cl-free' conditions were verified as described below.

#### Pharmacological assessment of mechanisms contributing to amplified $\text{Na}^+$ uptake post-bleeding

An affinity shift observed in bled relative to un-bled condition in  $\text{Na}^+$  kinetics experiments indicated the possible use of two distinct transport pathways by which the snails take up  $\text{Na}^+$ , one under basal conditions and a second during recovery following fluid loss. We hypothesized that these transport pathways might display different pharmacological characteristics. Amiloride (*N*-amidino-3,5-diamino-6-chloropyrazinecarboxamide hydrochloride: hydrate; Sigma-Aldrich), which inhibits  $\text{Na}^+$  transport by blocking  $\text{Na}^+$  channels at  $0.34 \mu\text{mol l}^{-1}$  amiloride and other forms of  $\text{Na}^+$  transport, including  $\text{Na}^+/\text{H}^+$  exchangers, at  $83.8 \mu\text{mol l}^{-1}$  amiloride (Kleyman and Cragoe, 1988; Masereel et al., 2003), was utilized in this experiment at concentrations that were sufficiently above the effective range of the drug for the  $\text{Na}^+$  channel (used  $10 \mu\text{mol l}^{-1}$  in our study) and the  $\text{Na}^+/\text{H}^+$  exchanger (used  $100 \mu\text{mol l}^{-1}$  in our study). For these experiments 30 un-bled and 30 bled snails with pre-bleed weights of 1–1.5 g were placed in individual chambers containing 20 ml of ATW ( $500 \mu\text{mol l}^{-1}$  nominal  $[\text{Na}^+]$  as  $\text{NaCl}$ ) and either dimethyl sulfoxide [ $(\text{CH}_3)_2\text{SO}$ , DMSO, vehicle control,  $N=10$ ],  $10^{-5} \text{ mol l}^{-1}$  amiloride ( $N=10$ ), or  $10^{-4} \text{ mol l}^{-1}$  ( $N=10$ ) amiloride dissolved in DMSO and allowed to recover for

approximately 60 min prior to addition of  $^{22}\text{Na}$  and commencement of 2-h flux as described above. In this experiment, separate snails were used for the bled and un-bled conditions. This allowed us to use amiloride under both basal and recovery conditions to evaluate whether different mechanisms were being utilized to maintain  $\text{Na}^+$  homeostasis compared to recovery following fluid loss.

To provide further insight into the mechanism of  $\text{Na}^+$  uptake, we used  $100 \mu\text{mol l}^{-1}$  ethylisopropylamiloride ( $\text{C}_{11}\text{H}_{18}\text{ClN}_7\text{O}$ , EIPA; Sigma-Aldrich) dissolved in a final concentration of 1% DMSO to determine the possible role of a  $\text{Na}^+/\text{H}^+$  exchanger in  $\text{Na}^+$  uptake for un-bled ( $N=5$ ) and bled ( $N=10$ ) snails. EIPA is an NHE-specific amiloride analogue not believed to inhibit  $\text{Na}^+$  channels (Kleyman and Cragoe, 1988). Additionally, we tested for effects of a proton pump inhibitor, bafilomycin ( $\text{C}_{35}\text{H}_{58}\text{O}_9$ ; Sigma-Aldrich), on  $\text{Na}^+$  uptake to evaluate potential  $\text{H}^+$  pump involvement under both un-bled ( $N=7$ ) and bled ( $N=10$ ) conditions. Bafilomycin was dissolved in DMSO for a final concentration of  $1 \mu\text{mol l}^{-1}$  bafilomycin and 0.1% DMSO.

To assess whether the rapid activation of  $\text{Na}^+$  uptake was mediated by cellular trafficking or recruitment of transport proteins in vesicular compartments to the apical membrane, colchicine was employed. Colchicine is a microtubule disruptor that provides for a rudimentary assessment of possible transporter relocation from cytoplasmic compartments to the epithelial membrane. Un-bled snails were subjected to flux measurements employing the same procedure described above for 2 h in 20 ml of ATW containing  $^{22}\text{Na}$  ( $2 \mu\text{Ci}$ ) and  $500 \mu\text{mol l}^{-1} \text{ Na}^+$  as  $\text{NaCl}$ . Following the initial flux, snails were bled and allowed to recover for 1 h in  $^{22}\text{Na}$ -free ATW with  $500 \mu\text{mol l}^{-1} \text{ Na}^+$  as  $\text{NaCl}$  that was either drug free (control), had 1% DMSO (vehicle control), or that had  $10^{-4} \text{ mol l}^{-1}$  colchicine ( $\text{C}_{22}\text{H}_{25}\text{NO}_6$ , Sigma-Aldrich) dissolved in DMSO. Then a second  $^{22}\text{Na}$  flux was performed in the same recovery chambers. Thus, fluxes were completed on the same group of snails (10 controls and 10 per treatment) first in the un-bled drug-free condition, then in the bled condition with colchicine exposure.

Regardless of the mechanism of  $\text{Na}^+$  transport employed by freshwater organisms, cellular substrate in the form of  $\text{H}^+$  appears to be important for  $\text{Na}^+$  uptake. To test the possibility that an increase in cellular substrate availability through increased cellular hydration of  $\text{CO}_2$  to form  $\text{HCO}_3^-$  and  $\text{H}^+$  was involved in the rapidly activated  $\text{Na}^+$  transport, a lipophilic carbonic anhydrase inhibitor, ethoxzolamide (6-ethoxy-2-benzothiazolesulfonamide,  $\text{C}_9\text{H}_{10}\text{N}_2\text{O}_3\text{S}_2$ , ETOX; Sigma-Aldrich), was employed. An experiment with control (ATW), 1% DMSO (vehicle control), and  $10^{-4} \text{ mol l}^{-1}$  ETOX dissolved in DMSO was performed on un-bled ( $N=10$  for both controls and ETOX) and bled ( $N=8, 10$  and  $10$ , respectively) snails as described above for the amiloride experiment. Final DMSO concentration was maintained at 1% of total flux volume for the vehicle control and all pharmacological treatments with the exception of bafilomycin, for which DMSO concentration was 0.1% of total flux volume.

#### Analytical techniques and calculations for $\text{Na}^+$ kinetics experiments

Hemolymph samples were analyzed for pH, total  $\text{CO}_2$ , osmotic pressure,  $[\text{Na}^+]$ ,  $[\text{Cl}^-]$ ,  $[\text{Ca}^{2+}]$  and protein concentration. In addition, samples from selected time points were analyzed for  $[\text{Cu}]$ , the central metal in gastropod respiratory proteins (Sminia, 1977). Within 1 h after collection, samples were analyzed for pH (Radiometer Analytical MeterLab PHM201, Cedex, France) and total  $\text{CO}_2$  (Corning Carbon Dioxide Analyzer 965, Essex, UK),

which were used to determine partial pressure of CO<sub>2</sub> ( $P_{CO_2}$ ) using the Henderson-Hasselbalch equation and  $pK_I$  and  $pK_{II}$  values of 6.135 and 9.61, respectively, as obtained from Truchot alignment nomograms (Truchot, 1976). Osmotic pressure was measured by vapor pressure osmometry (Wescor Vapro 5520, Logan, UT, USA), cation concentrations were determined by flame atomic absorption spectrophotometry (Varian SpectrAA220, Mulgrave, Victoria, Australia), and  $[Cl^-]$  was determined by a colorimetric reaction based on the method of Zall et al. (Zall et al., 1956). Total protein concentration in each hemolymph sample was determined by the Bradford protein assay using bovine serum albumin standards (Bradford, 1976). The  $[Cu]$  was determined using graphite furnace atomizer, atomic absorption spectrophotometry (Varian SpectrAA220 with a SpectrAA GTA110, Mulgrave, Victoria, Australia).

The initial and final water samples from flux experiments were analyzed for <sup>22</sup>Na activity (Packard Cobra II Auto-Gamma, Meriden, Connecticut, USA) with a window of 15–2000 keV and  $[Na^+]$  was measured as described above. Unidirectional  $Na^+$  influx was calculated from the mean specific activity of the initial and final water samples, the snail mass and the total flux time as described previously (Grosell et al., 2000). Net flux values were obtained from the change in total  $[Na^+]$  during the flux period, snail mass and elapsed flux time, whereas efflux was determined as the difference between net flux and influx.

Samples of the stock test solutions (from anion-dependency experiments) of NaCl, sodium gluconate and Na<sub>2</sub>SO<sub>4</sub> before use in flux experiments and initial and final flux waters for six randomly selected snails (three un-bled and three bled) from each treatment were analyzed for  $[Cl^-]$  and  $[SO_4^{2-}]$  using anion chromatography (DIONEX DX 120 PeakNet 6, Sunnyvale, CA, USA) to verify 'Cl<sup>-</sup>-free' conditions. Results for each analytical procedure are reported as mean ± s.e.m.

### Statistical analyses

Time course data were analyzed using one-way repeated-measures ANOVA comparing initial hemolymph characteristics to values at later time points with statistically significant differences among means being evaluated by Student's *t*-test using multi-sample Bonferroni correction. Uptake kinetic constants were determined assuming Michaelis–Menten kinetics and using the non-linear regression function in SigmaPlot for Windows version 8.00:

$$J = (J_{max} \times [Na^+]) / (K_m + [Na^+])$$

Kinetic constants from snails in the bled and un-bled condition were subsequently compared using Student's *t*-test.

For the anion-dependency and pharmacological analyses, Student's *t*-tests were used to determine the significance of drug effects or ambient anion ( $Cl^-$  and/or  $HCO_3^-$ ) availability on  $Na^+$  uptake rates in bled and un-bled conditions. Tests for normality and equal variance were completed before selecting the statistical test. For pharmacological data sets that were normally distributed and/or exhibited homoscedasticity (i.e. influx data), we used a one-way ANOVA with Holm–Sidak test of multiple comparisons as a more powerful alternative for multiple comparison testing relative to a Tukey's test. To assess differences among non-parametric data sets (i.e. efflux, and some of the net flux sets), Dunn's test of multiple comparisons was employed following a Kruskal–Wallis Rank Sums test as the more appropriate test for unequal sample sizes. All analyses were completed using SigmaStat for Windows version 3.00 and comparisons were considered significantly different at  $P < 0.05$ .

## RESULTS

### Solute recovery in extracellular fluid

All snails exhibited significant losses of extracellular fluid (ECF) volume, major ions and other solutes following the initial bleeding event. Of the 134 snails sampled at the initial time point, seven escaped or died over the course of the experiment. Data from the initial sampling of these snails were not included in the analyses.

The significant loss of nearly 30% of ECF, evident from fluid volumes obtained at the second bleeding at 2 h, was regained in 8 h as indicated by the increase in body mass (Fig. 1A), but fluid composition did not completely return to initial conditions during the first 2 weeks of the time course. Despite substantial fluid loss, osmotic pressure was generally 9–10% lower for the first 18–24 h, but rarely significantly so (Fig. 1B).  $Na^+$  and  $Cl^-$  were the major ionic constituents of the initial osmotic pressure value of 109.8 mOsmol kg<sup>-1</sup>.  $Na^+$  took 24–48 h to recover to initial values from a 29% loss (Fig. 1C); and  $Cl^-$  also recovered from a significant loss of 39% in the same timeframe, though with greater variability (Fig. 1D).  $Ca^{2+}$  contributed much less to osmotic pressure and showed no significant change in concentration over the experimental period (Fig. 1E). Though total CO<sub>2</sub> concentration (mainly  $HCO_3^-$ ) was much greater than that of  $Ca^{2+}$ , it also did not vary significantly during the time examined (Fig. 1F). Additionally, snail ECF had brief periods of significant alkalosis and increases in  $P_{CO_2}$  during earlier time points (first 24–72 h) and though both returned to initial levels concurrently or before the other parameters, including  $[Cu]$  and total protein concentration, there was significant acidosis and significantly elevated  $P_{CO_2}$  levels at 10 weeks (Table 2). The significant loss of Cu (Fig. 2A) and total proteins (Fig. 2B) did not recover over the 2 week sampling period and subsequent experiments revealed recovery by 5 weeks after the initial fluid loss. Surprisingly, plasma protein concentration exceeded initial values at 10 weeks.

### Na<sup>+</sup> transport kinetics

Sodium uptake rates increased with increasing ambient  $[Na^+]$  in a hyperbolic pattern characteristic of Michaelis–Menten kinetics in

Table 2. Mean pH and  $P_{CO_2}$  for extracellular fluid samples taken from snails at the initial time point and sub-sets of the initial group re-sampled at time intervals listed

| Time point (h) (N) | pH         | $P_{CO_2}$ (Pa) |
|--------------------|------------|-----------------|
| 0 (118)            | 8.34±0.01  | 385.3±13.33     |
| 2 (3)              | 8.37±0.09  | 269.3±85.33     |
| 4 (3)              | 8.32±0.05  | 380.0±8.00      |
| 6 (8)              | 8.45±0.05* | 328.0±48.00     |
| 8 (8)              | 8.33±0.04  | 341.3±46.66     |
| 10 (8)             | 8.43±0.04* | 364.0±25.33     |
| 12 (8)             | 8.35±0.02  | 414.6±32.00     |
| 16 (8)             | 8.40±0.05  | 413.3±85.33     |
| 18 (7)             | 8.27±0.03  | 490.6±32.00*    |
| 24 (8)             | 8.31±0.03  | 400.0±36.00     |
| 48 (8)             | 8.34±0.02  | 380.00±22.66    |
| 72 (7)             | 8.43±0.09* | 292.0±44.00     |
| 168 (10)           | 8.24±0.02  | 413.3±28.00     |
| 336 (10)           | 8.23±0.04  | 388.00±37.33    |
| 5 weeks (10)       | 8.21±0.04  | 361.3±30.66     |
| 10 weeks (8)       | 8.02±0.06* | 596.00±100.00*  |

Asterisks indicate time points for which data were significantly different from time 0 mean. Smaller sample sizes at 2 h and 4 h were due to insufficient fluid volumes to complete all analyses at these time points. Values are means ± s.e.m.

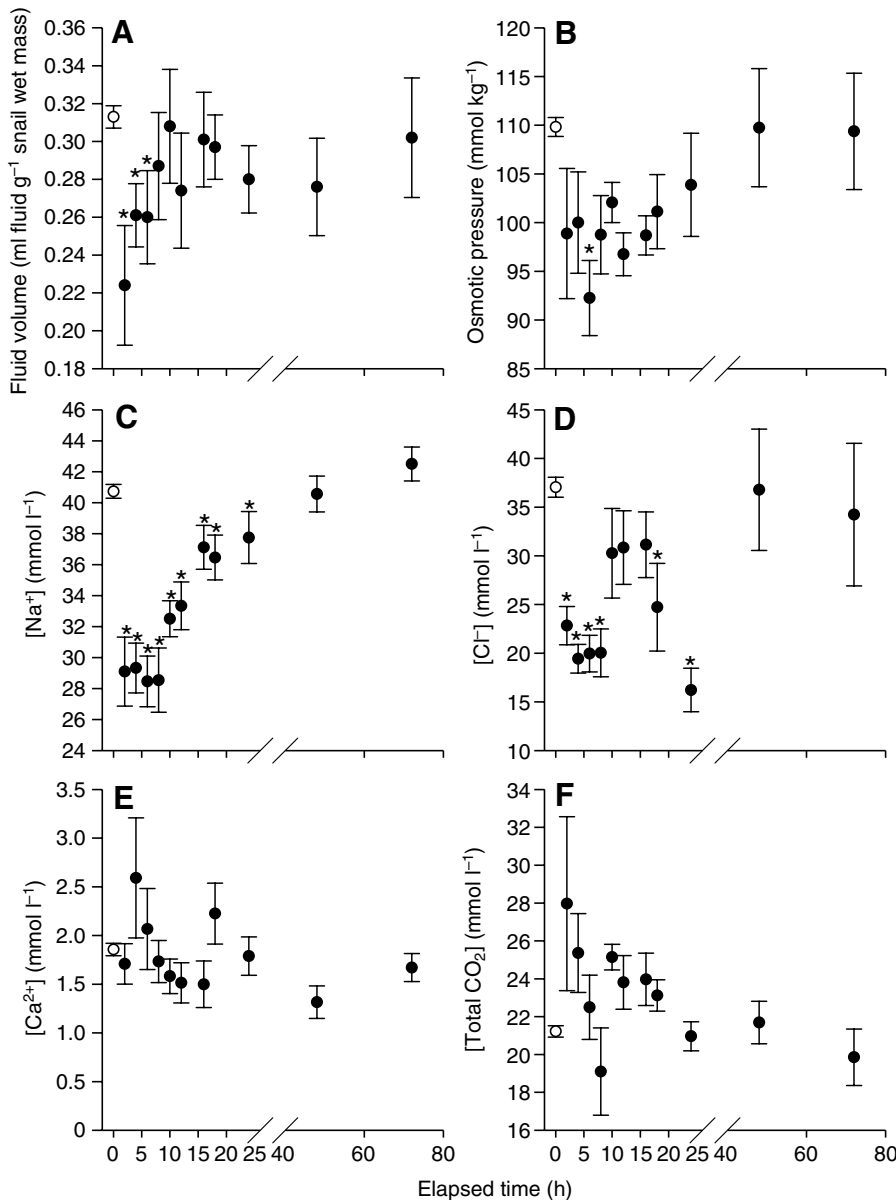

Fig. 1. Fluid volume released during bleeding (A), osmotic pressure (B), and the concentrations of the main electrolytes (C)  $\text{Na}^+$ , (D)  $\text{Cl}^-$ , (E)  $\text{Ca}^{2+}$  and (F) total  $\text{CO}_2$ ; in hemolymph from *L. stagnalis* taken from all individuals at the initial time point (open circles) and again from subsets of the same initial snails in groups of eight individuals at any one time point between 2 and 72 h (closed circles) following initial sampling. Asterisks indicate values significantly different from initial time point. Values are means  $\pm$  s.e.m. ( $N=114$  at  $t_0$  and  $N=8$  at later time points).

snails under both bled and un-bled conditions (Fig. 3); however, snails in the bled condition had significantly greater capacity (3.1-fold) and affinity (threefold) for  $\text{Na}^+$  relative to the un-bled condition. In both cases, the affinity value (apparent  $K_m$ ) was well below the  $[\text{Na}^+]$  in which the snails were reared ( $\sim 1 \text{ mmol l}^{-1}$ ; Fig. 3). Flux values recorded at  $2 \text{ mmol l}^{-1} \text{ Na}^+$  did not conform to the saturation kinetics observed at flux concentrations below the rearing concentration of  $1 \text{ mmol l}^{-1}$ . Therefore, values recorded for snails in the un-bled and bled condition that were fluxed at nominal  $[\text{Na}^+]$  of  $2 \text{ mmol l}^{-1}$  were excluded from the regression analysis but are included in Fig. 3.

In addition to increased uptake rates with respect to ambient  $[\text{Na}^+]$  and whether snails were fluid-depleted, bled snails also exhibited a general increase in unidirectional  $\text{Na}^+$  efflux relative to when they were under un-bled conditions. Nevertheless, there was consistently less net  $\text{Na}^+$  loss and generally a net gain of  $\text{Na}^+$  under recovery conditions (Table 3) with few exceptions. Although snails fluxed at  $100 \mu\text{mol l}^{-1} \text{ Na}^+$  conformed to the aforementioned general trend of increased influx, they still experienced a net loss

of  $\text{Na}^+$  under bled conditions, albeit less loss than under pre-bleed conditions.

#### Assessment of anion dependency in $\text{Na}^+$ transport

The changes in transport kinetics equated to a general four- to fivefold increase in  $\text{Na}^+$  uptake rate for bled snails in  $500 \mu\text{mol l}^{-1} \text{ Na}^+$ . This increase was neither  $\text{Cl}^-$  (Fig. 4) nor  $\text{HCO}_3^-$  dependent (Fig. 5). When  $500 \mu\text{mol l}^{-1} \text{ Na}^+$  was made available to the snails in  $\text{Cl}^-$ -free medium (sodium gluconate and sodium sulfate) versus the  $\text{NaCl}$  control, there was no significant difference in  $\text{Na}^+$  uptake rates for either the bled or un-bled condition. However, there was significantly greater unidirectional efflux of  $\text{Na}^+$  in un-bled snails in  $0 \mu\text{mol l}^{-1}$  nominal  $[\text{Cl}^-]$  medium relative to those in  $500 \mu\text{mol l}^{-1} \text{ Cl}^-$ , which resulted in significant net  $\text{Na}^+$  loss relative to  $\text{NaCl}$  control (Table 4). For snails under recovery conditions, there was no apparent correlation between  $\text{Cl}^-$  availability and unidirectional  $\text{Na}^+$  efflux or net flux. The  $\text{Cl}^-$  concentration in the  $\text{NaCl}$  stock solution was  $490.3 \mu\text{mol l}^{-1}$ , in the sodium gluconate stock was  $10.1 \mu\text{mol l}^{-1} \text{ Cl}^-$ , and in the sodium sulfate stock was

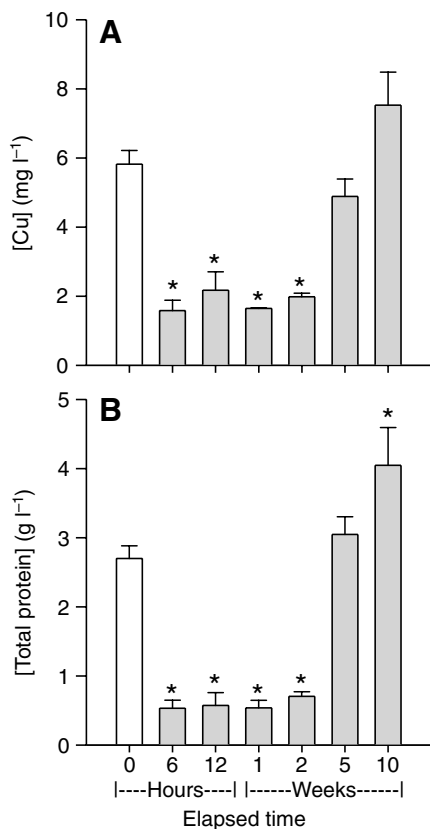

Fig. 2. (A) Copper and (B) total protein concentrations in hemolymph of *L. stagnalis* as a function of time. Individuals were bled at time 0 (open bars;  $N=54$  for Cu,  $N=53$  for proteins) and sub-groups (closed bars) were bled again at 6 h ( $N=8$  for Cu and  $N=6$  for proteins), 12 h ( $N=7$  for Cu and  $N=8$  for proteins), 1 week ( $N=10$  for Cu and total proteins), 2 weeks ( $N=10$  for Cu and total proteins), 5 weeks ( $N=10$  for Cu and total proteins) and 10 weeks ( $N=9$  for Cu and total proteins). Asterisks indicate values significantly different from initial time point values. Values are means  $\pm$  s.e.m.

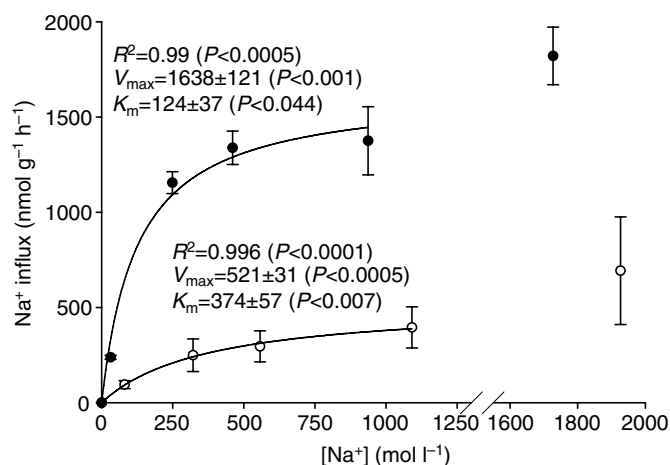

Fig. 3. Sodium uptake rates ( $\text{nmol g}^{-1} \text{h}^{-1}$ ) as a function of ambient  $\text{Na}^+$  ion concentration, by the pond snail *L. stagnalis*. Values are for bled (closed circles) and un-bled (open circles) snails. Regression lines are Michaelis-Menten curves (SigmaPlot 8.0 for Windows). Uptake values at  $2 \text{ mmol l}^{-1} [\text{Na}^+]$  were excluded from the regression analysis because they did not conform to the saturation kinetics observed at and below the rearing concentration of  $1 \text{ mmol l}^{-1}$ .  $N=10$  for each data point. Values are means  $\pm$  s.e.m.

Table 3. Sodium efflux and net flux in pond snail *Lymnaea stagnalis* under un-bled and bled conditions with varying ambient  $[\text{Na}^+]$

| Nominal $[\text{Na}^+]$ ( $\mu\text{mol l}^{-1}$ ) | Condition (N) | Efflux ( $\text{nmol g}^{-1} \text{h}^{-1}$ ) | Net flux ( $\text{nmol g}^{-1} \text{h}^{-1}$ ) |
|----------------------------------------------------|---------------|-----------------------------------------------|-------------------------------------------------|
| 100                                                | Un-bled       | $-226 \pm 14^\dagger$                         | $-131 \pm 19$                                   |
|                                                    | Bled (10)     | $-277 \pm 9^\ddagger$                         | $-39 \pm 9^\ddagger$                            |
| 250                                                | Un-bled (9)   | $-361 \pm 57$                                 | $-111 \pm 33$                                   |
|                                                    | Bled (10)     | $-932 \pm 57$                                 | $223 \pm 34$                                    |
| 500                                                | Un-bled (10)  | $-446 \pm 57$                                 | $-150 \pm 35$                                   |
|                                                    | Bled (10)     | $-1045 \pm 91$                                | $293 \pm 38$                                    |
| 1000*                                              | Un-bled (9)   | $-456 \pm 99$                                 | $-61 \pm 23$                                    |
|                                                    | Bled (9)      | $-1163 \pm 151$                               | $212 \pm 71$                                    |
| 2000                                               | Un-bled (8)   | $-735 \pm 256$                                | $-41 \pm 38$                                    |
|                                                    | Bled (10)     | $-1518 \pm 107$                               | $303 \pm 53$                                    |

\*Concentration at which snails were reared and to which all statistical comparisons of  $\text{Na}^+$  effects were made ( $1000 \mu\text{mol l}^{-1}$ ). Values (means  $\pm$  s.e.m.) for un-bled compared to bled condition within treatment concentration were significantly different except  $100 \mu\text{mol l}^{-1} \text{Na}^+$  concentration.

$^\dagger$ Significantly lower efflux rate compared with respective condition in  $1000 \mu\text{mol l}^{-1}$  treatment.

$^\ddagger$ Significantly lower net flux rate than bled snails in  $1000 \mu\text{mol l}^{-1}$  treatment.

below detection limit ( $\sim 2 \mu\text{mol l}^{-1}$ ). The mean  $[\text{Cl}^-]$  in snail flux chambers with  $^{22}\text{Na}$  isotope were  $534.1 \pm 27.88 \mu\text{mol l}^{-1}$  (maximum  $698.3 \mu\text{mol l}^{-1}$ ),  $41.1 \pm 5.01 \mu\text{mol l}^{-1}$  (maximum  $72.9 \mu\text{mol l}^{-1}$ ) and  $60.4 \pm 16.96 \mu\text{mol l}^{-1}$  (maximum  $177.1 \mu\text{mol l}^{-1}$ ) for NaCl, sodium gluconate and sodium sulfate, respectively. Bicarbonate availability did not affect  $\text{Na}^+$  uptake in snails in the bled or un-bled condition provided with  $500 \mu\text{mol l}^{-1} \text{Na}^+$  and 0, 100 or  $500 \mu\text{mol l}^{-1} \text{HCO}_3^-$  (Fig. 5). With the exception of the NaCl ( $100 \mu\text{mol l}^{-1} \text{HCO}_3^-$ ), un-bled snails had significantly greater unidirectional efflux rates than when they were in the bled condition (Table 5). There was an unexpected higher basal  $\text{Na}^+$  uptake rate for the bicarbonate dependency experiment with no significant differences in uptake rates from the different sources of  $\text{Na}^+$  for un-bled snails (Fig. 5, Table 5). However, there was still

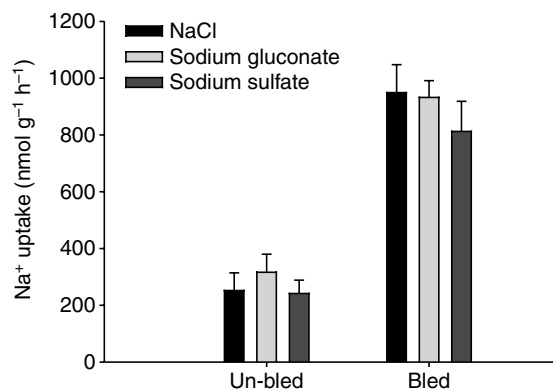

Fig. 4. Assessment of  $\text{Cl}^-$  dependency for  $\text{Na}^+$  uptake by un-bled and bled *L. stagnalis* as tested under control (with NaCl) and treatment (with sodium gluconate or sodium sulfate) conditions. Each treatment medium contained  $500 \mu\text{mol l}^{-1}$  of  $\text{Na}^+$ . Differences between un-bled and bled conditions within treatments were significantly different. There were no significant differences among  $\text{Na}^+$ -treatment groups in un-bled or bled conditions.  $N=10$  snails in all cases. Values are means  $\pm$  s.e.m.

Table 4. Assessment of  $\text{Cl}^-$  dependency of  $\text{Na}^+$  efflux and net flux

| Na compound (nominal $[\text{Cl}^-]$ ; $\mu\text{mol l}^{-1}$ ) | Condition (N) | Efflux ( $\text{nmol g}^{-1} \text{h}^{-1}$ ) | Net flux ( $\text{nmol g}^{-1} \text{h}^{-1}$ ) |
|-----------------------------------------------------------------|---------------|-----------------------------------------------|-------------------------------------------------|
| NaCl (500)                                                      | Un-bled (9)   | $-232 \pm 28$                                 | $19 \pm 54$                                     |
|                                                                 | Bled (10)     | $-362 \pm 38$                                 | $587 \pm 124$                                   |
| Sodium gluconate (0)                                            | Un-bled (10)  | $-457 \pm 32^*$                               | $-141 \pm 59^\dagger$                           |
|                                                                 | Bled (10)     | $-267 \pm 17$                                 | $665 \pm 55$                                    |
| Sodium sulfate (0)                                              | Un-bled (10)  | $-595 \pm 35^*$                               | $-354 \pm 64^\dagger$                           |
|                                                                 | Bled (10)     | $-326 \pm 29$                                 | $487 \pm 89$                                    |

Values (means  $\pm$  s.e.m.) for un-bled compared with bled condition within treatment concentration were significantly different.

\*Significantly greater unidirectional efflux than un-bled snails in  $500 \mu\text{mol l}^{-1} \text{Cl}^-$ .

$^\dagger$ Significantly greater net  $\text{Na}^+$  loss relative to un-bled snails in  $500 \mu\text{mol l}^{-1} \text{Cl}^-$ .

a net gain of  $\text{Na}^+$  across all  $\text{HCO}_3^-$  concentrations and ECF-level conditions.

#### Pharmacological assessment of $\text{Na}^+$ uptake

Of the five drugs tested, all except colchicine elicited significant reductions of post-bleed  $\text{Na}^+$  uptake. In the amiloride experiment, bled snails treated with amiloride exhibited a concentration-dependent suppression of the amplified  $\text{Na}^+$  uptake, which was significant at the  $100 \mu\text{mol l}^{-1}$  amiloride concentration, compared to DMSO-control snails (Fig. 6). Sodium uptake in un-bled control snails was not affected by amiloride and there was no significant effect of DMSO on  $\text{Na}^+$  uptake in un-bled or bled snails (Fig. 6). DMSO control, bled snails had significantly less unidirectional  $\text{Na}^+$  efflux and significantly greater net  $\text{Na}^+$  uptake than bled control snails (Table 6).

For the experiments to test efficiency of EIPA, bafilomycin and ETOX, bled snails in DMSO vehicle control exhibited significantly greater unidirectional  $\text{Na}^+$  efflux than non-DMSO bled controls (Table 7). However, there was no significant effect of DMSO on net  $\text{Na}^+$  flux. EIPA-treated, bled snails had

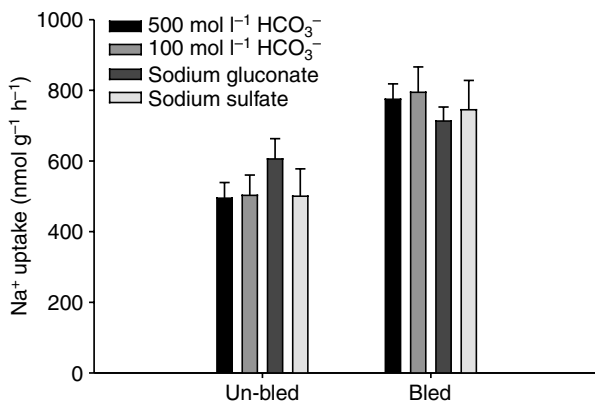

Fig. 5. Assessment of  $\text{HCO}_3^-$  dependency for  $\text{Na}^+$  uptake by bled and un-bled *L. stagnalis* as tested under control (sodium bicarbonate) and treatment (NaCl, sodium gluconate or sodium sulfate) conditions. Each treatment medium contained  $500 \mu\text{mol l}^{-1}$  of  $\text{Na}^+$ . Differences between un-bled and bled conditions within treatments were significantly different. There were no significant differences among sodium treatment groups in un-bled or bled conditions.  $N=10$  in all cases except control (NaCl,  $N=8$ ) and sodium gluconate treatment ( $N=9$ ). Values are means  $\pm$  s.e.m.

Table 5. Assessment of  $\text{HCO}_3^-$  dependency of  $\text{Na}^+$  efflux and net flux

| Na compound (nominal $[\text{HCO}_3^-]$ ; $\mu\text{mol l}^{-1}$ ) | Condition (N) | Efflux ( $\text{nmol g}^{-1} \text{h}^{-1}$ ) | Net flux ( $\text{nmol g}^{-1} \text{h}^{-1}$ ) |
|--------------------------------------------------------------------|---------------|-----------------------------------------------|-------------------------------------------------|
| $\text{NaHCO}_3^-$ (500)                                           | Un-bled (9)   | $-426 \pm 60$                                 | $69 \pm 83$                                     |
|                                                                    | Bled (9)      | $-200 \pm 46$                                 | $574 \pm 80$                                    |
| NaCl (100)                                                         | Un-bled (7)   | $-240 \pm 17$                                 | $263 \pm 58$                                    |
|                                                                    | Bled (9)      | $-223 \pm 43$                                 | $571 \pm 62$                                    |
| Sodium gluconate (0)                                               | Un-bled (10)  | $-468 \pm 31$                                 | $137 \pm 48$                                    |
|                                                                    | Bled (9)      | $-168 \pm 21$                                 | $545 \pm 30$                                    |
| Sodium sulfate (0)                                                 | Un-bled (9)   | $-443 \pm 63$                                 | $57 \pm 76$                                     |
|                                                                    | Bled (10)     | $-194 \pm 62$                                 | $551 \pm 108$                                   |

Values (means  $\pm$  s.e.m.) for un-bled compared to bled condition within treatment concentration were significantly different except unidirectional efflux within the  $100 \mu\text{mol l}^{-1} [\text{HCO}_3^-]$ .

Table 6. Effect of a  $\text{Na}^+$  transport inhibitor amiloride on  $\text{Na}^+$  efflux and net flux

| Drug                                 | Condition (N) | Efflux ( $\text{nmol g}^{-1} \text{h}^{-1}$ ) | Net flux ( $\text{nmol g}^{-1} \text{h}^{-1}$ ) |
|--------------------------------------|---------------|-----------------------------------------------|-------------------------------------------------|
| Control                              | Un-bled (9)   | $-617 \pm 54$                                 | $-389 \pm 49$                                   |
|                                      | Bled (8)      | $-587 \pm 214$                                | $685 \pm 86$                                    |
| 1% DMSO control                      | Un-bled (10)  | $-559 \pm 65$                                 | $-269 \pm 56$                                   |
|                                      | Bled (10)     | $-154 \pm 26^*$                               | $1162 \pm 68^\dagger$                           |
| $10 \mu\text{mol l}^{-1}$ amiloride  | Un-bled (10)  | $-648 \pm 69$                                 | $-358 \pm 64$                                   |
|                                      | Bled (10)     | $-408 \pm 281$                                | $976 \pm 126$                                   |
| $100 \mu\text{mol l}^{-1}$ amiloride | Un-bled (9)   | $-421 \pm 47$                                 | $-157 \pm 65$                                   |
|                                      | Bled (9)      | $-64 \pm 127$                                 | $988 \pm 104^\dagger$                           |

\*Significantly less unidirectional efflux relative to un-bled snails in DMSO.

For all other within treatment efflux comparisons, un-bled and bled condition values were not significantly different.

$^\dagger$ Significantly greater net uptake relative to bled control. Net flux values for un-bled compared to bled condition within treatments were significantly different.

Values are means  $\pm$  s.e.m.

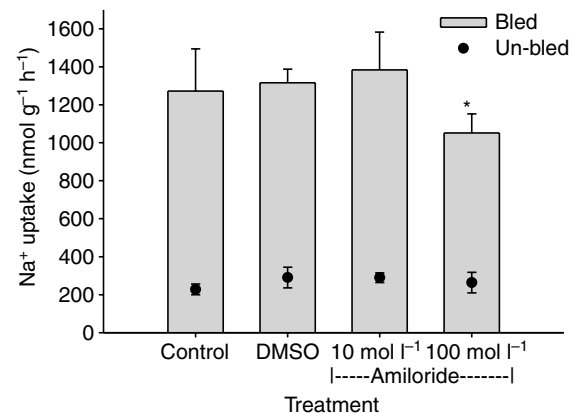

Fig. 6. Effect of 1% dimethyl sulfoxide (DMSO) and two amiloride concentrations on un-bled (closed circles) and bled (gray bars) snails.  $N=10$  for each concentration/treatment. Both un-bled and bled snails were exposed to DMSO or amiloride. Asterisk indicates value significantly less than DMSO control value. Differences between un-bled and bled conditions within treatments were significantly different. There was no significant difference between uptake rates in regular control relative to rates in the DMSO carrier control medium. Values are means  $\pm$  s.e.m.

Table 7. Effect of ethylisopropylamiloride (EIPA), ethoxzolamide (ETOX) and bafilomycin on unidirectional Na<sup>+</sup> efflux and net flux in snails under un-bled and bled conditions

| Drug            | Condition (N) | Efflux (nmol g <sup>-1</sup> h <sup>-1</sup> ) | Net flux (nmol g <sup>-1</sup> h <sup>-1</sup> ) |
|-----------------|---------------|------------------------------------------------|--------------------------------------------------|
| Control         | Un-bled (10)  | -559±30                                        | -257±49                                          |
|                 | Bled (8)      | -136±23 <sup>†</sup>                           | 505±58                                           |
| 1% DMSO control | Un-bled (10)  | -440±27                                        | -249±35                                          |
|                 | Bled (10)     | -384±38                                        | 411±97                                           |
| EIPA            | Un-bled (5)   | -552±68                                        | -424±62                                          |
|                 | Bled (10)     | -266±64                                        | 230±29 <sup>§</sup>                              |
| ETOX            | Un-bled (10)  | -2534±195*                                     | -2057±209 <sup>†</sup>                           |
|                 | Bled (10)     | -208±36                                        | 360±44                                           |
| Bafilomycin     | Un-bled (7)   | -890±147*                                      | -767±164                                         |
|                 | Bled (10)     | -125±57 <sup>†</sup>                           | 256±40                                           |

\*Significantly greater unidirectional Na<sup>+</sup> efflux compared with un-bled DMSO vehicle control.

<sup>†</sup>Significantly greater net Na<sup>+</sup> loss compared with un-bled DMSO vehicle control.

<sup>‡</sup>Significantly less unidirectional Na<sup>+</sup> efflux compared with bled DMSO vehicle control.

<sup>§</sup>Significantly less net Na<sup>+</sup> uptake compared with bled DMSO vehicle control. Values are presented as mean ± s.e.m.

significantly reduced net (Fig. 7) and net (Table 7) Na<sup>+</sup> uptake rates relative to DMSO controls. Bled snails treated with bafilomycin had significantly lower unidirectional Na<sup>+</sup> influx (Fig. 7) rates compared with the DMSO controls. Bled snails treated with ETOX had significantly reduced Na<sup>+</sup> uptake rates (Fig. 7); however there was no significant effect of ETOX on unidirectional efflux or net flux in bled snails. The system responsible for the amplified Na<sup>+</sup> uptake observed in bled snails displayed no apparent sensitivity to colchicine for unidirectional influx, efflux or net flux (Table 8).

In un-bled snails, there was a significant increase in unidirectional Na<sup>+</sup> influx in DMSO carrier-control snails but the increase was not great enough to cause a significant effect in Net Na<sup>+</sup> flux (Fig. 7). There was no significant effect of EIPA on un-bled snails (Fig. 7, Table 7). Un-bled snails treated with the proton pump inhibitor, bafilomycin had significantly greater unidirectional Na<sup>+</sup> efflux rates relative to DMSO carrier controls; however the effect on net Na<sup>+</sup> flux was not statistically significant (Table 7). Also, ETOX-treated, un-bled snails had significantly greater unidirectional influx (Fig. 7) and efflux, with a resulting net Na<sup>+</sup> loss compared to DMSO control snails (Table 7). Un-bled snails were not treated with colchicine as we were interested in transporters that were possibly mobilized to facilitate the observed amplified uptake in bled snails.

Table 8. Effect of colchicine on unidirectional Na<sup>+</sup> influx, efflux and net flux in snails under bled condition

| Drug            | Condition (N) | Influx (nmol g <sup>-1</sup> h <sup>-1</sup> ) | Efflux (nmol g <sup>-1</sup> h <sup>-1</sup> ) | Net flux (nmol g <sup>-1</sup> h <sup>-1</sup> ) |
|-----------------|---------------|------------------------------------------------|------------------------------------------------|--------------------------------------------------|
| Control         | Bled (10)     | 870±122                                        | -241±40                                        | 628±120                                          |
| 1% DMSO control | Bled (10)     | 813±81                                         | -254±55                                        | 559±74                                           |
| Colchicine      | Bled (9)      | 900±87                                         | -280±64                                        | 620±120                                          |

There were no significant differences among controls and colchicine treatment. Values are means ± s.e.m.

## DISCUSSION

The naïve *L. stagnalis* utilized in the time course experiment exhibited a remarkable ability to recover significant losses of extracellular fluid (ECF) volume, major and some minor ions in a relatively short period of time despite its hypo-osmotic environment. Our non-lethal sampling technique required that the snails be air-exposed to allow collection of the ECF; however, these snails do exhibit the same full-body retraction while submerged (personal observation). The major osmolytes recovered from a 30% loss in 1–2 days. Initial concentrations of the major ions, Na<sup>+</sup> and Cl<sup>-</sup>, in pallial fluid of *L. stagnalis* were 40.73±0.445 and 37.04±1.027 mmol l<sup>-1</sup>, respectively and were slightly lower than those previously reported in hemolymph, which were approximately 49 mmol l<sup>-1</sup> Na<sup>+</sup> (Burton, 1968) and approximately 44 mmol l<sup>-1</sup> Cl<sup>-</sup> (de With and van der Schors, 1982) from the same species. Based on Schlichter (Schlichter, 1981), we expected higher ion concentrations in pallial fluid relative to hemolymph values reported in the literature.

With respect to other ions measured, there were no significant changes in [Ca<sup>2+</sup>] or total CO<sub>2</sub> (mostly HCO<sub>3</sub><sup>-</sup>) though pH and P<sub>CO2</sub> data indicated possible respiratory acidosis and partial compensation. Additionally, significant losses of protein and Cu, a component of the respiratory pigment hemocyanin, did not recover until 5 weeks after the initial fluid loss. Therefore, it was clear that the major osmotic constituents in these snails are recovered quickly; but the delayed recovery of some potentially important components such as Cu and plasma proteins indicates that repeat sampling may influence hemolymph chemistry significantly.

*L. stagnalis* exhibited saturation kinetics of Na<sup>+</sup> uptake in relation to ambient sodium concentrations, and displayed amplified Na<sup>+</sup> uptake in the bled condition similar to previously reported uptake rates of 132 nmol g<sup>-1</sup> h<sup>-1</sup> for un-bled snails acclimated to artificial tapwater containing 350 μmol l<sup>-1</sup> Na<sup>+</sup> (Greenaway, 1970). Additionally, Na<sup>+</sup> uptake was 363±0.27 nmol g<sup>-1</sup> h<sup>-1</sup> for the Greenaway study in which snails were bled in a similar manner to that used in our study but acclimated to 350 μmol l<sup>-1</sup> [Na<sup>+</sup>] and maintained in a 280 μmol l<sup>-1</sup> Na<sup>+</sup> solution for a 1 h <sup>22</sup>Na flux. We measured unidirectional influx rates of 249±86 nmol g<sup>-1</sup> h<sup>-1</sup> and 1155±57 nmol g<sup>-1</sup> h<sup>-1</sup> for ambient [Na<sup>+</sup>] of 321 μmol l<sup>-1</sup> [Na<sup>+</sup>] and 248 μmol l<sup>-1</sup> [Na<sup>+</sup>] for snails under un-bled and bled conditions, respectively. Though the absolute flux values are different between the present and the earlier studies, the approximately threefold increase in the Greenaway (Greenaway, 1970) study was similar to the fourfold increase in our study. One point for consideration is that in the Greenaway study, different snails were utilized for the un-bled and bled snail experiments but flux values presented in the present study are for the same snails in the un-bled and bled conditions. Net flux rates observed in snails fluxed in 100 μmol l<sup>-1</sup> nominal [Na<sup>+</sup>] indicated continued net loss of sodium even under post-bled conditions, which suggested a possible lower threshold of 100–250 μmol l<sup>-1</sup> [Na<sup>+</sup>] below which the snails may be unable to recover from a bleeding event.

Four- to fivefold increases in sodium uptake rates of post-bleed snails relative to basal conditions provide some insight into the mode of relatively fast recovery observed in the time course. The total amount of extracellular Na<sup>+</sup> in naïve snails estimated from the measured hemolymph [Na<sup>+</sup>] and the reported volume of 0.45 ml hemolymph g<sup>-1</sup> (van Aardt, 1968) is 18.3 μmol g<sup>-1</sup>. This is comparable to 10.5 μmol g<sup>-1</sup>



snail 2 h post-bleeding estimated from the  $[\text{Na}^+]_{\text{ECF}}$  at that time and a reduction in hemolymph volume of  $0.089 \text{ ml g}^{-1}$  (the difference between volume released by naïve snails and snails re-bled 2 h after first bleed). Comparing these numbers reveals a remarkable 43% extracellular  $\text{Na}^+$  loss and illustrates the need for  $\text{Na}^+$  recovery from the environment. As such, the elevated net  $\text{Na}^+$  uptake of  $212 \text{ nmol Na}^+ \text{ g}^{-1} \text{ h}^{-1}$  observed post-bleeding in snails allowed to flux in  $1000 \mu\text{mol l}^{-1} \text{ Na}^+$ , which is similar to the acclimation concentration (Table 3), if constant over the 48 h required for recovery, amounts to  $10.2 \mu\text{mol g}^{-1}$  and thus accounts almost perfectly for the observed return to normal hemolymph  $[\text{Na}^+]$  48 h post-bleeding.

Because the post-bled uptake rate increase was attributed to significant increases of both capacity and affinity of the system, it was necessary to consider increased activity of transporters already active under basal conditions and the likely activation (translation, trafficking or recruitment) of dormant and perhaps distinct transporters. However, the first step was to consider whether the system was dependent on availability of anions in ambient media. Environmental  $\text{Cl}^-$  may facilitate  $\text{Na}^+$  uptake through exchange of excess cytoplasmic  $\text{HCO}_3^-$  to maintain favorable conditions for continued  $\text{H}^+$  production *via* CA-mediated  $\text{CO}_2$  hydrolysis to be used in three known pathways for  $\text{Na}^+$  uptake in freshwater invertebrates. This could be *via* electroneutral apical  $\text{Na}^+/\text{H}^+$  exchange, electrogenic  $\text{Na}^+/\text{H}^+$  exchange (Ahearn et al., 1994), and/or an epithelial  $\text{Na}^+$  channel, which functions in conjunction with an apical  $\text{H}^+$  pump. To determine whether any of these systems was utilized to maintain  $\text{Na}^+$  homeostasis or for recovery, we assessed the possible use of these pathways under basal and recovery conditions. Previous studies have determined that  $\text{Na}^+$  uptake can occur in the absence of ambient  $\text{Cl}^-$  availability (Krogh, 1938; Krogh, 1939; Kirschner, 2004), although the rate may be reduced relative to conditions that provide  $\text{Cl}^-$  (de With et al., 1987). Considering this evidence that  $\text{Na}^+$  uptake can occur in  $\text{Cl}^-$ -free conditions, we were not surprised to find a lack of dependency on  $\text{Cl}^-$ . We

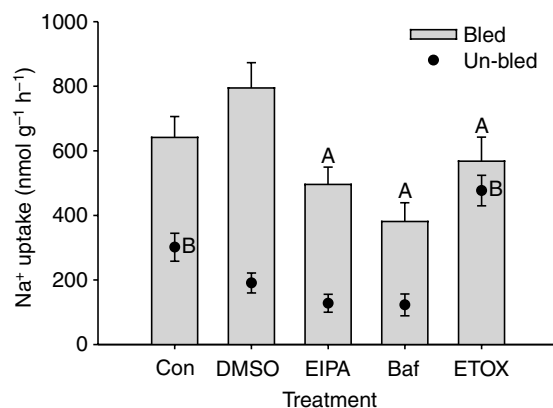

Fig. 7. Effect of 1% dimethyl sulfoxide (DMSO),  $100 \mu\text{mol l}^{-1}$  ethylisopropylamiloride (EIPA),  $100 \mu\text{mol l}^{-1}$  ethoxzolamide (ETOX) and  $1 \mu\text{mol l}^{-1}$  bafilomycin (Baf) on un-bled (closed circles) and bled (gray bars).  $N=10$  snails for each except un-bled EIPA ( $N=5$ ), un-bled bafilomycin ( $N=7$ ), and bled non-DMSO control ( $N=8$ ). Both un-bled and bled snails were treated as indicated. <sup>A</sup>Bled snails in drug treatments had significantly lower  $\text{Na}^+$  uptake rates than those in DMSO carrier control. <sup>B</sup>Un-bled snails in experimental control and those treated with ETOX had significantly greater unidirectional influx rates relative to those in the DMSO carrier control medium. Values are means  $\pm$  s.e.m.

also evaluated whether this system was dependent on environmental availability of  $\text{HCO}_3^-$  to allow uptake *via*  $\text{Na}^+/\text{HCO}_3^-$  co-transport. The higher  $\text{Na}^+$  uptake that was observed in un-bled snails in this experiment relative to other un-bled snails used in preliminary studies may have been due to any number of factors including, but not limited to, possible seasonal fluctuations in baseline  $\text{Na}^+$  flux rates or changes in feeding patterns. After finding no significant dependency of the system on ambient anion availability, we attempted to characterize possible transporters involved in the  $\text{Na}^+$  uptake under recovery and control conditions.

Pharmacological assessment of possible  $\text{Na}^+$  transport proteins facilitating the increased  $\text{Na}^+$  uptake rates in bled *L. stagnalis* revealed that the amplified uptake observed during the recovery phase is at least partially attributed to an amiloride-sensitive pathway (i.e.  $\text{Na}^+$  channels and/or  $\text{Na}^+/\text{H}^+$  exchange) and it appears that an electrogenic  $\text{Na}^+/\text{H}^+$  exchanger may be the greater contributor to the enhanced  $\text{Na}^+$  uptake associated with full-body withdrawal. Evidence for the involvement of an NHE transporter include no significant reduction in  $\text{Na}^+$  recovery uptake rates, at the low amiloride concentration ( $10 \mu\text{mol l}^{-1}$ ), which is assumed sufficient to inhibit the  $\text{Na}^+$  channels (Kleyman and Cragoe, 1988), but a reduction with the higher concentration ( $100 \mu\text{mol l}^{-1}$ ), which targeted  $\text{Na}^+/\text{H}^+$  exchange (Kleyman and Cragoe, 1988). Also there was a significant reduction in  $\text{Na}^+$  uptake in bled snails treated with EIPA, a more specific NHE inhibitor (Masereel et al., 2003). Furthermore, in bled snails the proton pump inhibitor, bafilomycin, caused the greatest reduction of any of the drugs used, which indicates the importance of the electrochemical gradient established by  $\text{H}^+$  extrusion *via* a  $\text{H}^+$  pump in the recovery phase system. The latter observation suggests that an electrogenic NHE-like protein may facilitate the amplified  $\text{Na}^+$  uptake. Electrogenic NHE in gill, renal and gastrointestinal tissues of freshwater and marine species from both superphyla of invertebrates, Protostomia and Deuterostomia, has been reported to exchange  $2\text{Na}^+$  for  $1\text{H}^+$  (Ahearn et al., 1994; Ahearn et al., 2001). Thus the potential for an electrogenic NHE-type transport exists. However, the potential involvement of a cation channel in the enhanced  $\text{Na}^+$  influx observed during the recovery phase cannot be excluded. Regardless of the mode of  $\text{Na}^+$  entry, this mechanism appears to be limited by availability of cellular substrate in the form of excess  $\text{H}^+$  as indicated by the reduced  $\text{Na}^+$  uptake by bled snails that were treated with a CA inhibitor, ethoxzolamide. The lack of an effect of colchicine on  $\text{Na}^+$  uptake following bleeding indicated that the amplified uptake observed in bled animals was not likely due to relocation of cytoplasmic transport proteins to the apical membrane.

The  $\text{Na}^+$  channel and  $\text{Na}^+/\text{H}^+$  inhibitor (amiloride), more specific  $\text{Na}^+$  channel blocker (EIPA), proton pump inhibitor (bafilomycin) and CA inhibitor (ETOX) were all tested on un-bled snails, but only ETOX had a significant effect on net  $\text{Na}^+$  transport. Interestingly, the significant effect of the ETOX treatment on all transport parameters measured in un-bled snails indicates a link between intracellular  $[\text{H}^+]$  and  $\text{Na}^+$  flux. Inhibition of CA results in elevated molecular  $\text{CO}_2$  in the integument epithelial cells which presumably will tend to acidify these cells. Enhanced compensatory  $\text{H}^+$  extrusion by NHE exchange is suggested by the significantly elevated  $\text{Na}^+$  influx (Fig. 7). The resulting  $\text{Na}^+$  gain appears to be more than fully compensated by elevated unidirectional  $\text{Na}^+$  efflux. It appears that maintaining acid-base balance under conditions of CA inhibition occurs at the cost of significant  $\text{Na}^+$  loss.

We conclude that though ECF chemistry is not completely restored to naïve, pre-bleed conditions, the noteworthy ability of this species to mobilize compensatory mechanisms on time scales of less than 3 h after significant fluid loss, is worthy of further study. Additionally, *L. stagnalis* recovers significant losses in volume first; then, and possibly more importantly, recovers major solutes from hypo-osmotic media in a matter of hours following fluid recovery. Finally, the ethoxzolamide sensitivity and the modest amiloride sensitivity of the system responsible for the Na<sup>+</sup> recovery indicates that the recovery process is at least partially dependent upon cellular substrate in the form of protons and likely occurs *via* an electrogenic Na<sup>+</sup>/H<sup>+</sup> anti-porter.

### Implications of findings

The consequences of the prolonged periods of reduced protein and Cu concentrations in the ECF are unknown, but if we assume the hemocyanin (and with that Cu) is one of the proteins lost with the ECF, impaired O<sub>2</sub> uptake and delivery may be one consequence. Such respiratory impairment might pose a need for more frequent surfacing for these facultative air-breathing snails following ECF loss, which could render them more susceptible to predation.

Furthermore, the energetic cost of the greatly increased Na<sup>+</sup> (and Cl<sup>-</sup>) uptake following a substantial loss of ECF might be significant to these snails and is clearly worthy of investigation.

### LIST OF ABBREVIATIONS

|                             |                                    |
|-----------------------------|------------------------------------|
| ATW                         | artificial tapwater                |
| Baf                         | bafilomycin                        |
| CA                          | carbonic anhydrase                 |
| DMSO                        | dimethyl sulfoxide                 |
| ECF                         | extracellular fluid                |
| EIPA                        | ethylisopropylamiloride            |
| ETOX                        | ethoxzolamide                      |
| P <sub>CO<sub>2</sub></sub> | partial pressure of carbon dioxide |

The authors thank Kevin Brix and Robert Gerdes for their assistance with this study and Chris Wood for providing insightful comments on early stages of this manuscript. This research was funded by a grant from the National Oceanic and Atmospheric Administration Educational Partnership Program.

### REFERENCES

- Ahearn, G. A., Zhuang, Z., Duerr, J. and Pennington, V. (1994). Role of invertebrate electrogenic 2Na<sup>+</sup>/1H<sup>+</sup> antiporter in monovalent and divalent cation transport. *J. Exp. Biol.* **196**, 319-335.
- Ahearn, G. A., Mandal, P. K. and Mandal, A. (2001). Biology of the 2Na<sup>+</sup>/1H<sup>+</sup> antiporter in invertebrates. *J. Exp. Zool.* **289**, 232-244.
- Alexander, J. E., Jr and Covich, A. P. (1991). Predation risk and avoidance behavior in two freshwater snails. *Biol. Bull.* **180**, 387-393.
- Arshavsky, Y. I., Delagina, T. G., Okshtein, I. L., Orlovsky, G. N., Panchin, Y. V. and Popova, L. B. (1994). Defense reaction in the pond snail *Planorbis corneus*. I. Activity of the shell-moving and respiratory systems. *J. Neurophysiol.* **71**, 882-890.
- Bradford, M. M. (1976). A rapid and sensitive method for the quantitation of microgram quantities of protein utilizing the principle of protein-dye binding. *Anal. Biochem.* **72**, 248-254.
- Brönmark, C. and Malmqvist, B. (1986). Interactions between the leech *Glossiphonia complanata* and its gastropod prey. *Oecologia* **69**, 268-276.
- Brown, K. M. (1991). Mollusca: Gastropoda. In *Ecology and Classification of North American Freshwater Invertebrates* (ed. J. H. Thorp and A. P. Covich), pp. 285-314. New York: Academic Press.
- Burton, R. F. (1968). Ionic balance in the blood of pulmonata. *Comp. Biochem. Physiol.* **25**, 509-516.
- Bury, N. R. and Wood, C. M. (1999). Mechanism of branchial apical silver uptake by rainbow trout *via* the proton-coupled Na<sup>+</sup> channel. *Am. J. Physiol.* **277**, R1385-R1391.
- de With, N. D. (1980). Water turn-over, ultrafiltration, renal water reabsorption and renal circulation in fed and starved specimens of *Lymnaea stagnalis*, adapted to different external osmolarities. *Proc. K. Ned. Akad. Wet. C* **83**, 109-120.
- de With, N. D. and van der Schors, R. C. (1982). On the interrelations of the Na<sup>+</sup> and Cl<sup>-</sup> influxes in the pulmonate freshwater snail *Lymnaea stagnalis*. *J. Comp. Physiol. B* **148**, 131-135.
- de With, N. D., Kok, T. P. and van der Schors, R. C. (1987). Relationships between apparent net H<sup>+</sup> excretion and Na<sup>+</sup>, Ca<sup>2+</sup> and Cl<sup>-</sup> uptake in the pulmonate freshwater snail *Lymnaea stagnalis*. *Comp. Biochem. Physiol.* **87A**, 671-675.
- Fenwick, J. C., Wendelaar Bonga, S. E. and Flik, G. (1999). *In vivo* bafilomycin-sensitive Na<sup>+</sup> uptake in young freshwater fish. *J. Exp. Biol.* **202**, 3659-3666.
- Greenaway, P. (1970). Sodium regulation in the freshwater mollusc, *Limnaea stagnalis* (L.) (Gastropoda: Pulmonata). *J. Exp. Biol.* **53**, 147-163.
- Grosell, M. and Wood, C. M. (2002). Copper uptake across rainbow trout gills: mechanisms of apical entry. *J. Exp. Biol.* **205**, 1179-1188.
- Grosell, M., Hogstrand, C., Wood, C. M. and Hansen, H. J. M. (2000). A nose-to-nose comparison of the physiological effects of exposure to ionic silver versus silver chloride in the European eel (*Anguilla anguilla*) and the rainbow trout (*Oncorhynchus mykiss*). *Aquat. Toxicol.* **48**, 327-342.
- Kirschner, L. B. (2004). The mechanism of sodium chloride uptake in hyperregulating aquatic animals. *J. Exp. Biol.* **207**, 1439-1452.
- Kleyman, T. R. and Cragoe, E. J. J. (1988). Amiloride and its analogs as tools in the study of ion transport. *J. Membr. Biol.* **105**, 1-21.
- Krogh, A. (1938). The active absorption of ions in some freshwater animals. *J. Comp. Physiol.* **A 25**, 335-350.
- Krogh, A. (1939). *Osmotic Regulation in Aquatic Animals*. New York: Dover Publications.
- Krogh, A. (1946). Croonian lecture: the active and passive exchanges of inorganic ions through the surfaces of living cells and through living membranes generally. *Proc. R. Soc. Lond. B Biol. Sci.* **133**, 140-200.
- Lin, H. and Randall, D. (1991). Evidence for the presence of an electrogenic proton pump on the trout gill epithelium. *J. Exp. Biol.* **161**, 119-134.
- Marshall, W. S. and Grosell, M. (2006). Ion transport, osmoregulation, and acid-base balance. In *The Physiology of Fishes* (ed. D. H. Evans and J. B. Claiborne), pp. 177-230. Boca Raton: Taylor & Francis Group.
- Masereel, B., Pochet, L. and Laeckmann, D. (2003). An overview of inhibitors of Na<sup>+</sup>/H<sup>+</sup> exchanger. *Eur. J. Med. Chem.* **38**, 547-554.
- McCarthy, T. M. and Fisher, W. A. (2000). Multiple predator-avoidance behaviours of the freshwater snail *Physella heterostropha pomila*: responses vary with risk. *Freshw. Biol.* **44**, 387-397.
- Perry, S. F., Furimsky, M., Bayaa, M., Georgalis, T., Shahsavariani, A., Nickerson, J. G. and Moon, T. W. (2003). Integrated responses of Na<sup>+</sup>/HCO<sub>3</sub><sup>-</sup> cotransporters and V-type H<sup>+</sup>-ATPases in the fish gill and kidney during respiratory acidosis. *Biochim. Biophys. Acta* **1618**, 175-184.
- Rundle, S. D. and Brönmark, C. (2001). Inter- and intraspecific trait compensation of defense mechanisms in freshwater snails. *Proc. R. Soc. Lond. B Biol. Sci.* **268**, 1463-1468.
- Schlichter, L. C. (1981). Ion relations of haemolymph, pallial fluid, and mucus of *Lymnaea stagnalis*. *Can. J. Zool.* **59**, 605-613.
- Sminia, T. (1977). Physiology of Hemocyanin: Haemocyanin-producing cells in gastropod molluscs. In *Proceedings in Life Sciences: Structure and Function of Haemocyanin* (ed. J. V. Bannister), pp. 279-288. New York: Springer-Verlag.
- Townsend, C. R. and McCarthy, T. K. (1980). On the defence strategy of *Physa fontinalis* (L.), a freshwater pulmonate snail. *Oecologia* **46**, 75-79.
- Tresguerres, M., Parks, S. K., Katoh, F. and Goss, G. G. (2006). Microtubule-dependent relocation of branchial V-H<sup>+</sup>-ATPase to the basolateral membrane in the Pacific spiny dogfish (*Squalus acanthias*): a role in base secretion. *J. Exp. Biol.* **209**, 599-609.
- Truchot, J. P. (1976). Carbon dioxide combining properties of the blood of the shore crab *Carcinus maenas* (L.): carbon dioxide solubility coefficient and carbonic acid dissociation constants. *J. Exp. Biol.* **64**, 45-57.
- Van Aardt, W. J. (1968). Quantitative aspects of the water balance in *Lymnaea stagnalis* (L.). *Neth. J. Zool.* **18**, 253-312.
- Zall, D. M., Fisher, D. and Garner, M. Q. (1956). Photometric determination of chlorides in water. *Anal. Chem.* **28**, 1665-1668.
